# Supplementary material
Source: MDPI journal article supplement (https://www.mdpi.com/2304-6767/12/3/54)
Supplement: s1 [file s1]

### S.1. Microhardness

Representative example images of the measurement of the indentation for the evaluation of microhardness of KM and FIX are given in Figures S1 and S2.

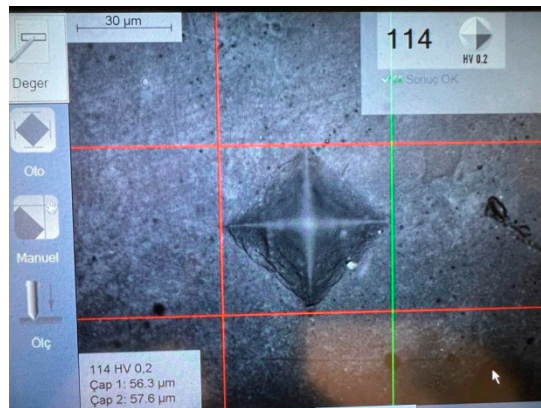

**Figure S1.** Measurement of indentation of KM.

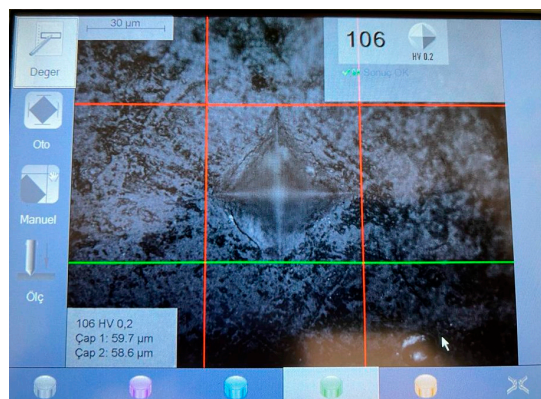

**Figure S2.** Measurement of indentation of FIX.

### S.2. EDX Analysis

EDX spectra of KM incorporating 0 and 6 wt% nano- or micro-silica are presented in Figures S3-S5, and EDX spectra of FIX incorporating 0 and 6 wt% nano- or micro-silica are presented in Figures S6-S8.

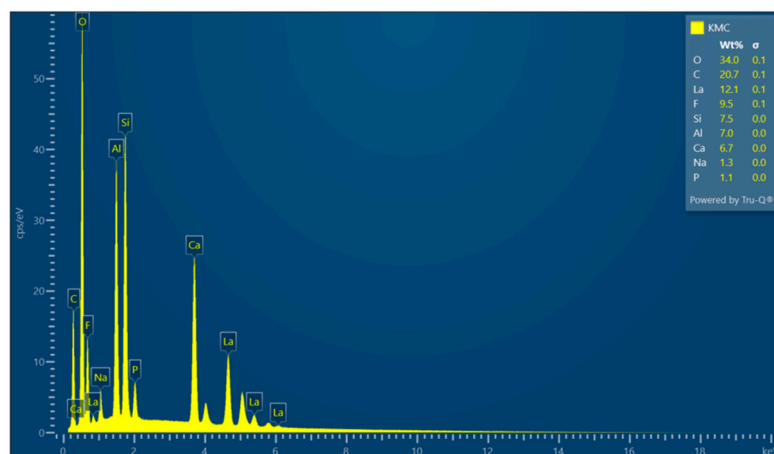

**Figure S3.** EDX spectrum of KM.

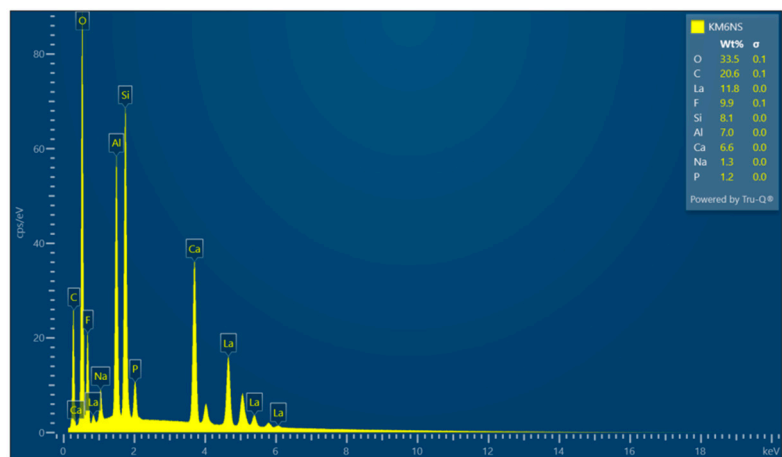

Figure S4. EDX spectrum of KM-6NS.

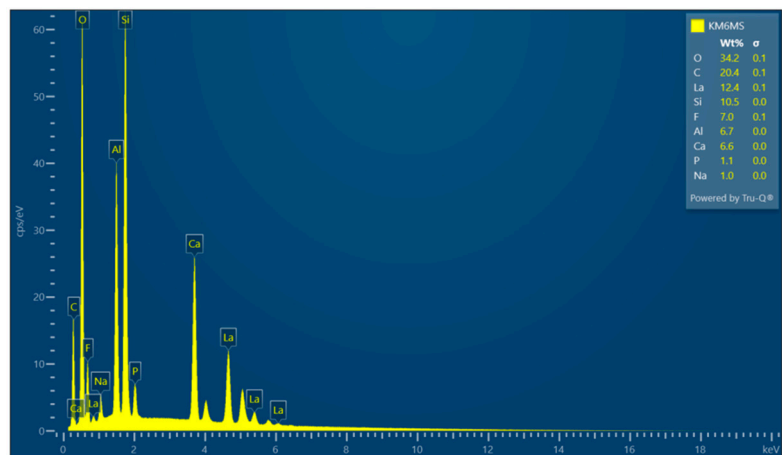

Figure S5. EDX spectrum of KM-6MS.

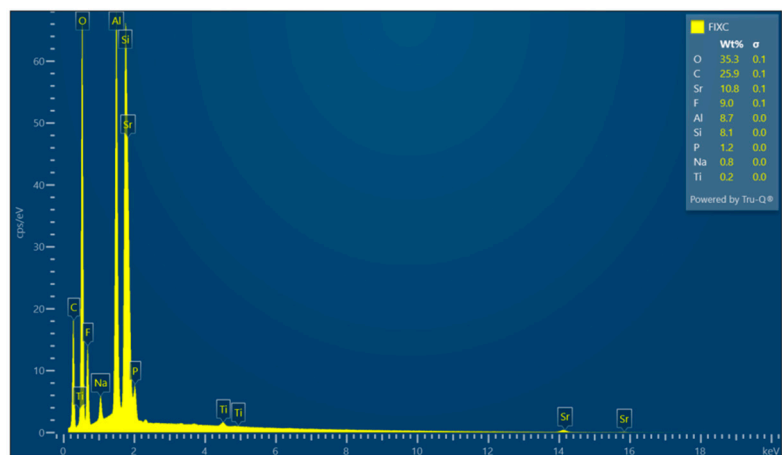

Figure S6. EDX spectrum of FIX.

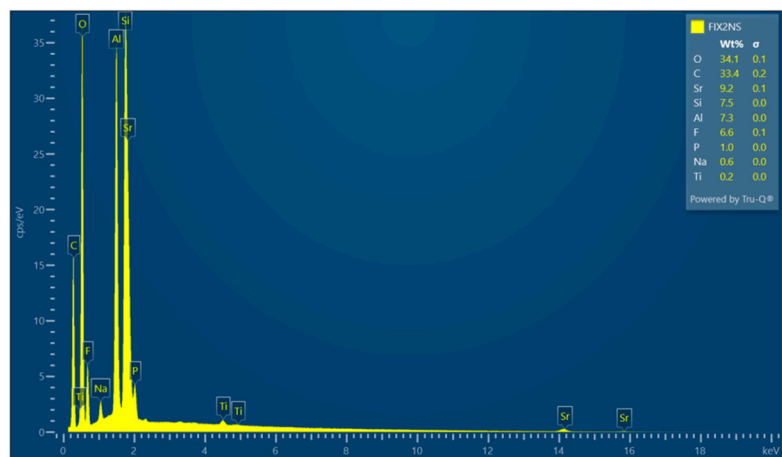

Figure S7. EDX spectrum of FIX-6NS.

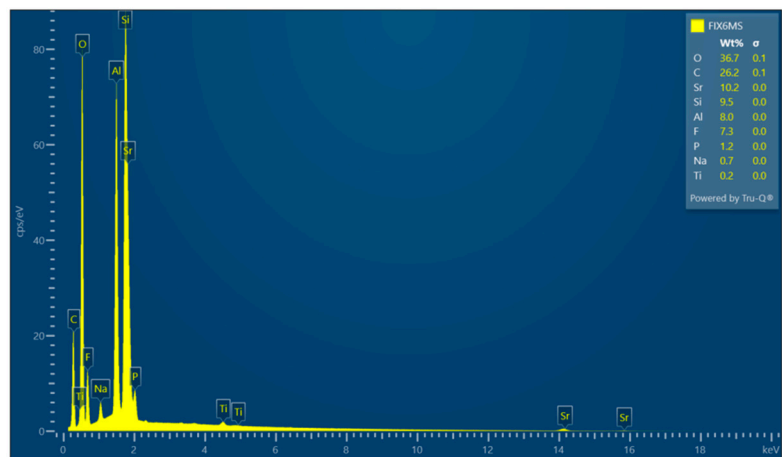

Figure S8. EDX spectrum of FIX-6MS.
